# Supplementary material for: Preparation of imidazole-modified paper membrane for selective extraction of gallic acid and its structural and functional analogues from Pomegranate Peel
Source: Royal Society of Chemistry journal article supplement (doi:10.1039/d3ra08576g), 2024-01-01
Supplement: d3ra08576g1.pdf [file d3ra08576g1.pdf]

## Supporting Information

### **Preparation of Imidazole-Modified Paper Membrane for Selective Extraction of Gallic Acid and its Structural and Functional Analogues from *Pomegranate Peel***

Xiaoxue Sun <sup>1#</sup>, Jingyu Zhang <sup>1#</sup>, Xiaohui Han <sup>1</sup>, Shumin Li <sup>1</sup>, Xuerui Zhang <sup>1</sup> and Xiaodong Bi <sup>1,2\*</sup>

1. School of Pharmaceutical Sciences & Institute of Materia Medica, Shandong First Medical University & Shandong Academy of Medical Sciences, Jinan 250117, Shandong, China.

2. Key Laboratory for Biotechnology Drugs of National Health Commission (Shandong Academy of Medical Sciences) Jinan 250117, Shandong, China.

<sup>#</sup>X. Sun and J. Zhang contributed equally.

\*Corresponding author. Email: xiaodongb\_pharm@126.com

## **Contents**

Table S1 Method comparison for analysis of gallic acid (GA) or other phenolic acids

Table S2 CFD simulation parameters.

Table S3 Searching results in MS library

Fig.S1 TIC (positive mode) of LC-TOF/MS for the MSPE-proposed *Pomegranate Peel* extract

Fig.S2 TIC (negative mode) of LC-TOF/MS for the MSPE-proposed *Pomegranate Peel* extract

Fig.S3 Secondary MS result for compound 1 (Catechin)

Fig.S4 Secondary MS result for compound 2 (Ellagic acid)

Fig.S5 Secondary MS result for compound 3 (Quercetin 3-O-galactoside)

Fig.S6 Secondary MS result for compound 4 (Corilagin)

Fig.S7 Secondary MS result for compound 5 (Gallic acid)

Fig.S8 Secondary MS result for compound 6 (beta-Glucogallin)

**Table S1** Method comparison for analysis of gallic acid (GA) or other phenolic acids

| Literature                                                     | Adsorption Method                         | Adsorbent materials                                                   | Sample                           | Method parameters or others                                                |
|----------------------------------------------------------------|-------------------------------------------|-----------------------------------------------------------------------|----------------------------------|----------------------------------------------------------------------------|
| <i>Food Anal. Meth.</i> <b>2020</b> , 13 (1), 155-165,         | d-SPE (dispersive solid-phase extraction) | Mixture of diatomaceous earth (DE) and graphitized carbon black (GCB) | <i>Myrciaria cauliflora</i> peel | Linear range: 0.1–137 µg/kg by UHPLC-MS/MS                                 |
| <i>J. Chromatogr. A</i> <b>2014</b> , 1342, 44-53,             | d-SPE                                     | C-18 (50 mg)                                                          | wine                             | Linear range:0.1-50 µg/mL by LC-MWD (-multi-wavelength detection)          |
| <i>J. Chromatogr. A</i> <b>2016</b> , 1453, 1-9,               | In-syringe extraction                     | Ni-Co layered double hydroxides (LDH)                                 | fruit juice                      | Linear range: 1-500 µg/L by LC-UV                                          |
| <i>J. Chromatogr. B</i> <b>2017</b> , 1041, 98-103,            | SPE (solid-phase extraction)              | MIP (molecularly imprinting polymer)                                  | phyllanthus urinaria L.          | Purification                                                               |
| <i>Anal. Bioanal. Chem.</i> <b>2015</b> , 407 (25), 7681-7690, | SPE                                       | MIP                                                                   | pomegranate rind                 | Linear range: 0.005–1.0 µg/mL and 5.0–1000µg/mL by LC-UV                   |
| <i>J. Sep. Sci.</i> <b>2011</b> , 34 (19), 2602-2610,          | SPE                                       | MIP (200 mg)                                                          | <i>Rhizoma homalomenae</i>       | Recovery 40% for GA by LC-DAD                                              |
| <i>Food Chem.</i> <b>2017</b> , 226, 23-31                     | SPE                                       | Sephadex LH-20 (820 mg)                                               | wine                             | Recovery 44%-99% by LC-MS/MS                                               |
| <i>J. Pharm. Biomed. Anal.</i> <b>2017</b> , 135, 87-96,       | µ-SPE (micro SPE)                         | Ika Ultra-Turrax® Tube Drive                                          | sea algae                        | Linear range: 0.2-5 ng/mL by LC-MS/MS                                      |
| <b>This work</b>                                               | MSPE (membrane SPE)                       | Imidazole-Modified Paper Membrane                                     | <i>Pomegranate Peel</i>          | Linear range (separated): 0.5-5 ng/mL, 5-100 ng/mL, 100-500 ng/mL by LC-UV |

**Table.S2** CFD simulation parameters

| Item                               | Detailed settings                                                                                                                                                                                                                                                                                                                                                                                                                                                                                                                                                                                                                                                                                                                                                                                                                                                                      |
|------------------------------------|----------------------------------------------------------------------------------------------------------------------------------------------------------------------------------------------------------------------------------------------------------------------------------------------------------------------------------------------------------------------------------------------------------------------------------------------------------------------------------------------------------------------------------------------------------------------------------------------------------------------------------------------------------------------------------------------------------------------------------------------------------------------------------------------------------------------------------------------------------------------------------------|
| <b>Geometry</b><br>(membrane zone) | Cylinder: radius:12.5 mm, height:2 mm<br>upper surface-inlet, lower surface-outlet<br>built in 2D axial symmetry model                                                                                                                                                                                                                                                                                                                                                                                                                                                                                                                                                                                                                                                                                                                                                                 |
| <b>Boundary conditions</b>         | Inlet: velocity inlet<br>Outlet: pressure outlet                                                                                                                                                                                                                                                                                                                                                                                                                                                                                                                                                                                                                                                                                                                                                                                                                                       |
| <b>Initial conditions</b>          | Concentration = 0 (in all zone at time = 0)                                                                                                                                                                                                                                                                                                                                                                                                                                                                                                                                                                                                                                                                                                                                                                                                                                            |
| <b>Compounds information</b>       | Molecular weight: 170.12 g/mol<br>Diffusion coefficient: $10^{-8}$ m <sup>2</sup> /s                                                                                                                                                                                                                                                                                                                                                                                                                                                                                                                                                                                                                                                                                                                                                                                                   |
| <b>Sample description</b>          | Concentration: 20 µg/mL<br>Solvent: water (density: 1000.0 kg/m <sup>3</sup> )<br>Volume: 5 mL<br>Flow time: 300 second<br>Injection: Concentration × Rectangular wave                                                                                                                                                                                                                                                                                                                                                                                                                                                                                                                                                                                                                                                                                                                 |
| <b>Porous medium</b><br>(all zone) | Fluid:<br>Velocity: 0.0034 cm/s (calculated by volume, flow time and geometry size)<br>Diffusion: by solvent, others-default<br>Porous zone:<br>Porosity:0.6 (estimated)<br>Adsorption: (temperature impact was not considered)<br>Base density: 1200 kg/m <sup>3</sup> (estimated)<br>Langmuir model:<br>$C_{p,i} = \frac{K_i \times C_{max,i} \times C_i}{1 + K_L \times C_i}$ where<br>$C_{p,i}$ – absorbed concentration on filter (mol/kg)<br>$C_i$ – concentration left in free solution (mol/kg)<br>$K_i$ – Langmuir constant for compound i(m <sup>3</sup> /mol)<br>$C_{max,i}$ – the maximum absorbed amount for compound i(mol/kg),<br>$i = 1-8$<br>$C_{max,i} = N_i \times S / M_i$ , where<br>$N_i$ – monolayer capacity for compound i (g/m <sup>2</sup> )<br>$S$ – BET specific surface area (m <sup>2</sup> /g), in this work, the value 10 m <sup>2</sup> /g was used. |
| <b>Meshing</b>                     | Extremely fine, controlled by physical field                                                                                                                                                                                                                                                                                                                                                                                                                                                                                                                                                                                                                                                                                                                                                                                                                                           |
| <b>Solution</b>                    | Transient, time step:1s within 0-300s                                                                                                                                                                                                                                                                                                                                                                                                                                                                                                                                                                                                                                                                                                                                                                                                                                                  |
| <b>Convergence</b>                 | Yes                                                                                                                                                                                                                                                                                                                                                                                                                                                                                                                                                                                                                                                                                                                                                                                                                                                                                    |
| <b>Others</b>                      | 1. For calculating the recovery, the field probe was used for later integral calculus.<br>2. For obtaining the breakthrough curve, point diagram of concentration vesus time at the center of the outlet was obtained in the postprocessing.                                                                                                                                                                                                                                                                                                                                                                                                                                                                                                                                                                                                                                           |



**Table S3** Searching results in MS library

| Number | Name                          | CAS        | ESI<br>mode* | RT/min | Mw       | m/z      | m/z range (EIC)    | Peak area |
|--------|-------------------------------|------------|--------------|--------|----------|----------|--------------------|-----------|
| 1      | Catechin                      | 7295-85-4  | +            | 2.49   | 290.0790 | 291.0860 | 291.0802-291.0981  | 126252741 |
| 2      | Ellagic acid                  | 476-66-4   | +            | 7.09   | 302.0063 | 303.0149 | 303.0088-303.0210  | 131585576 |
| 3      | Quercetin 3-O-<br>galactoside | 482-36-0   | +            | 7.71   | 464.0955 | 465.1030 | 465.0937-465.1123  | 117938614 |
| 4      | Corilagin                     | 23094-69-1 | -            | 3.9    | 634.0860 | 633.0743 | 633.0616-633.08706 | 456040405 |
| 5      | Gallic acid                   | 149-91-7   | -            | 1.26   | 170.0251 | 169.0145 | 169.0111-169.0179  | 602067382 |
| 6      | beta-Glucogallin              | 13405-60-2 | -            | 1.15   | 332.0743 | 331.069  | 331.0624-331.0756  | 142691542 |

\*ESI mode: “+” meant positive, “-” meant negative.

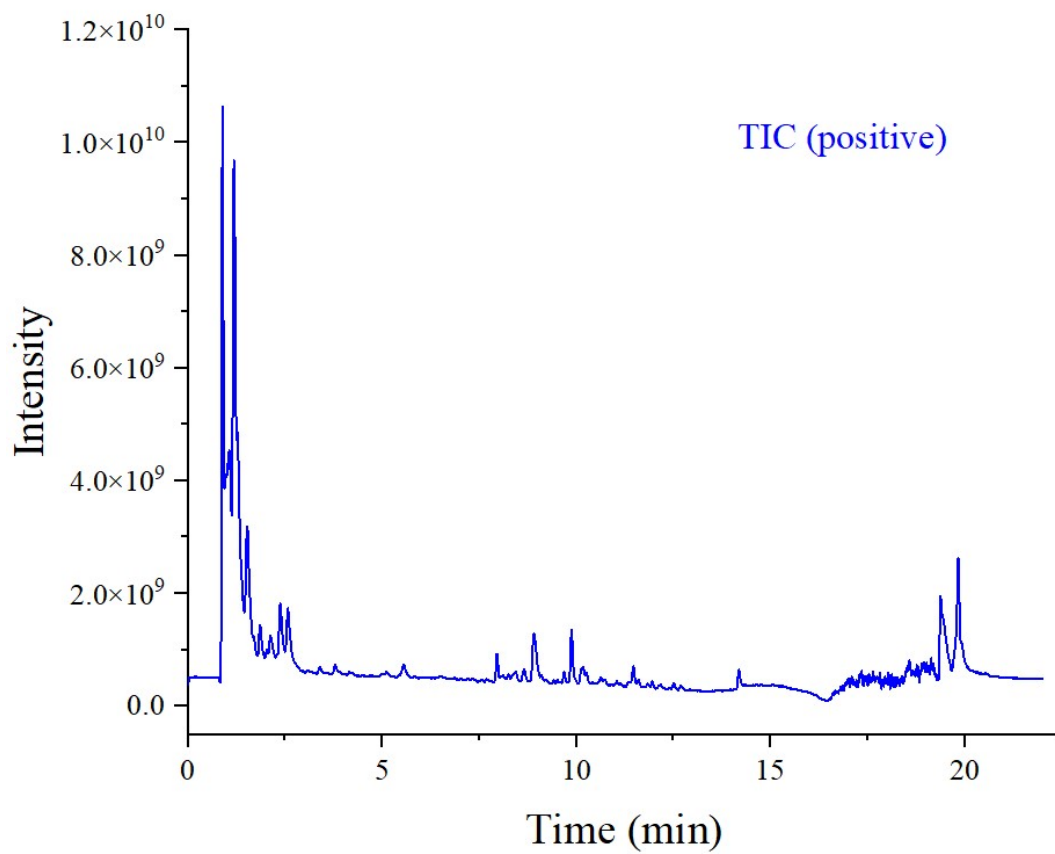

**Fig.S1** TIC (positive mode) of LC-TOF/MS for the MSPE-proposed *Pomegranate Peel* extract

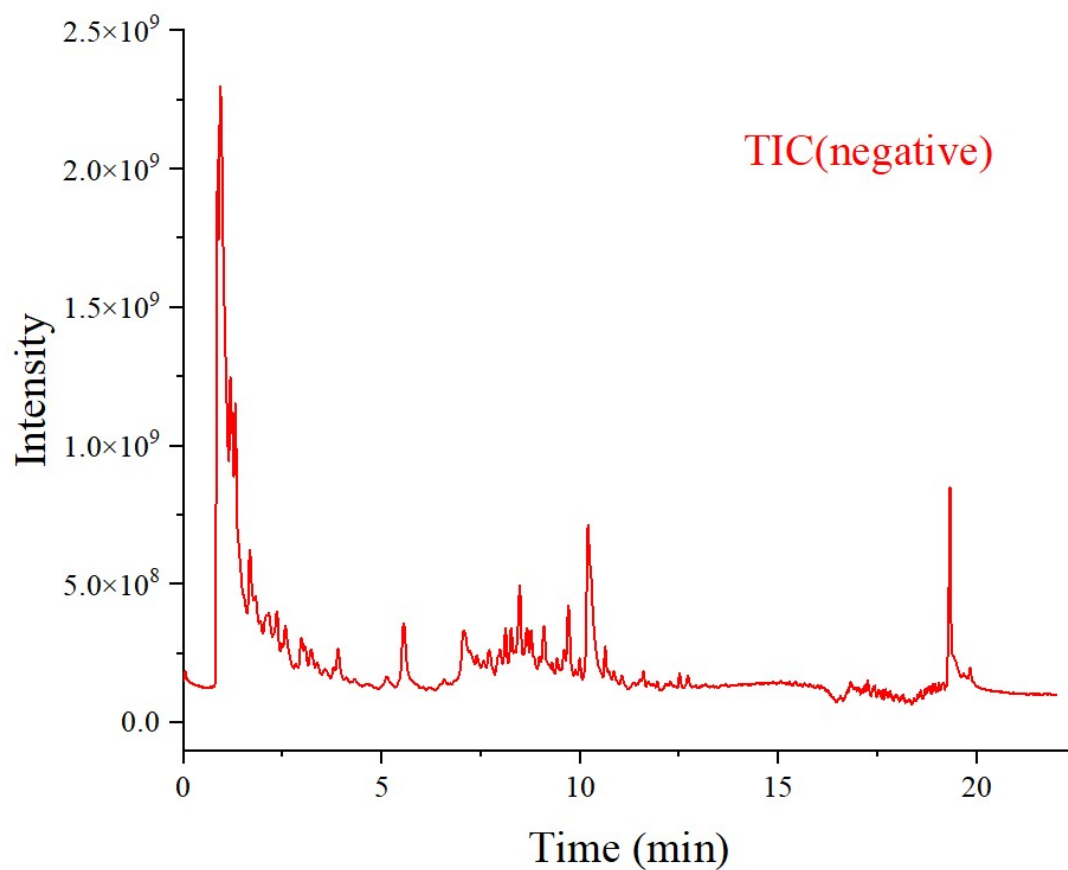

**Fig.S2** TIC (negative mode) of LC-TOF/MS for the MSPE-proposed *Pomegranate Peel* extract



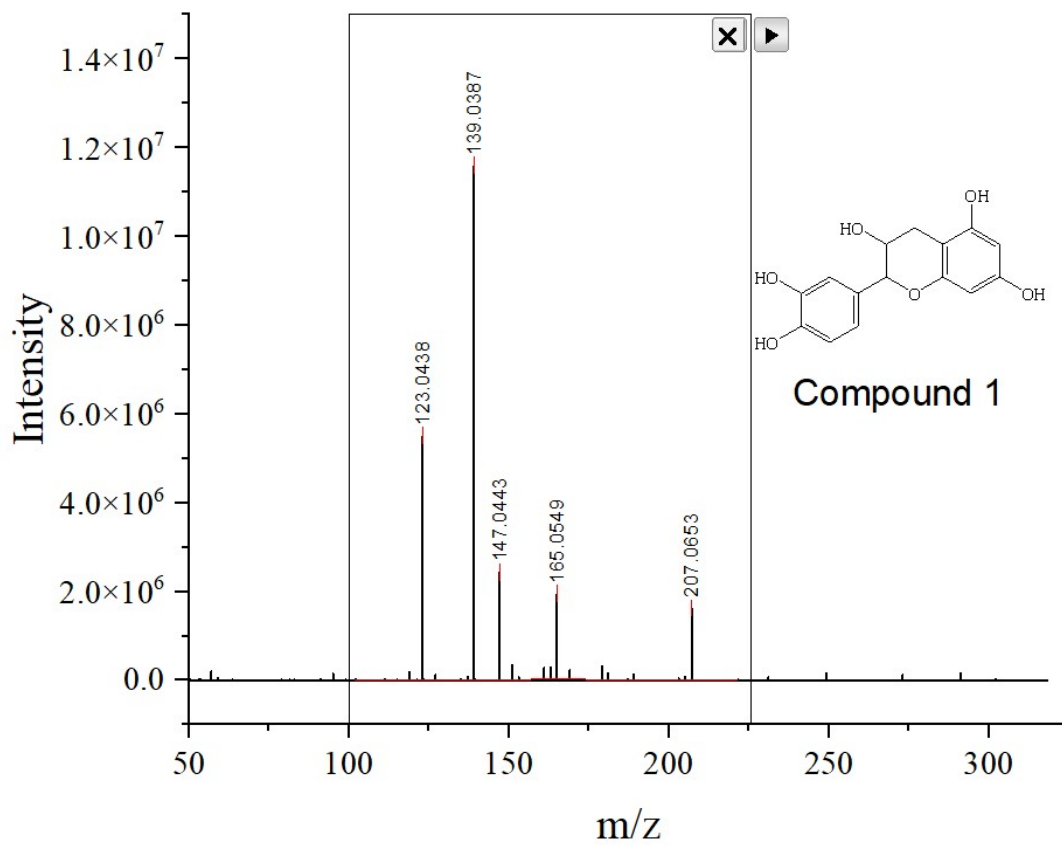

**Fig.S3** Secondary MS result for compound 1 (Catechin)

The rectangle in the figure (Fig.S3-S8) was added by origin software to marking peaks automatically

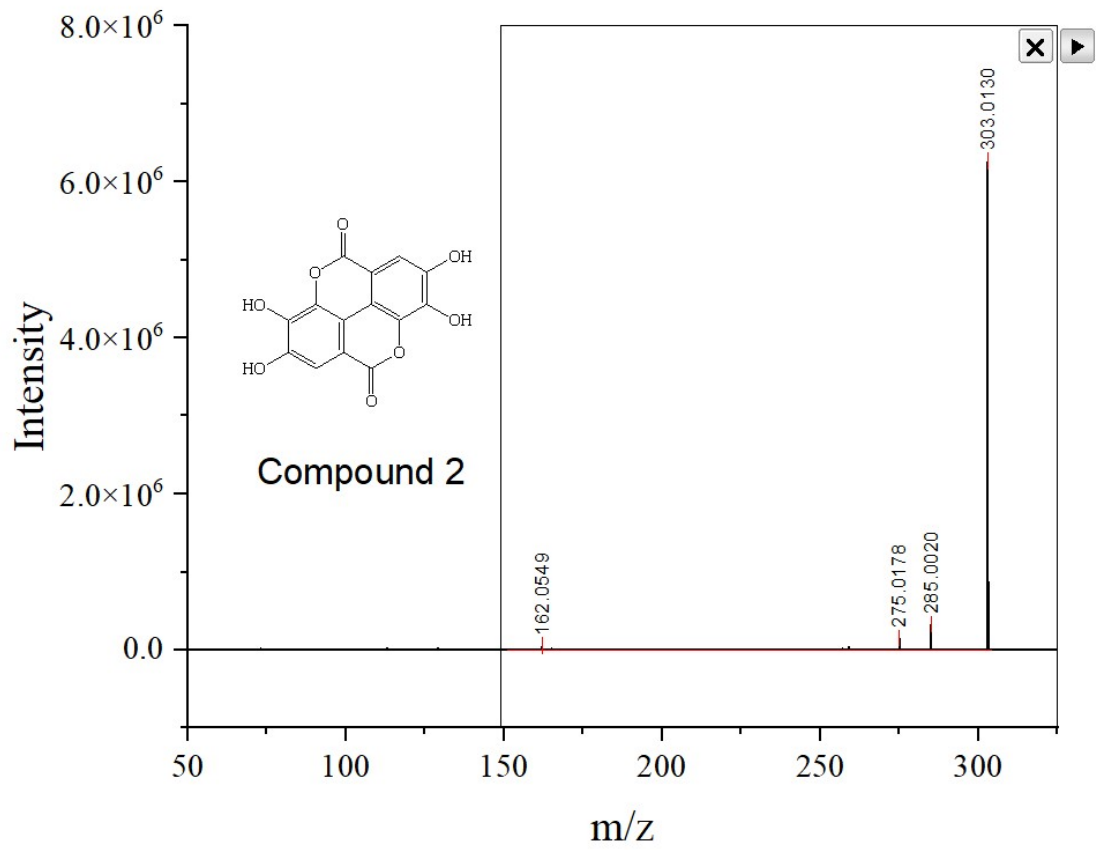

**Fig.S4** Secondary MS result for compound 2 (Ellagic acid)

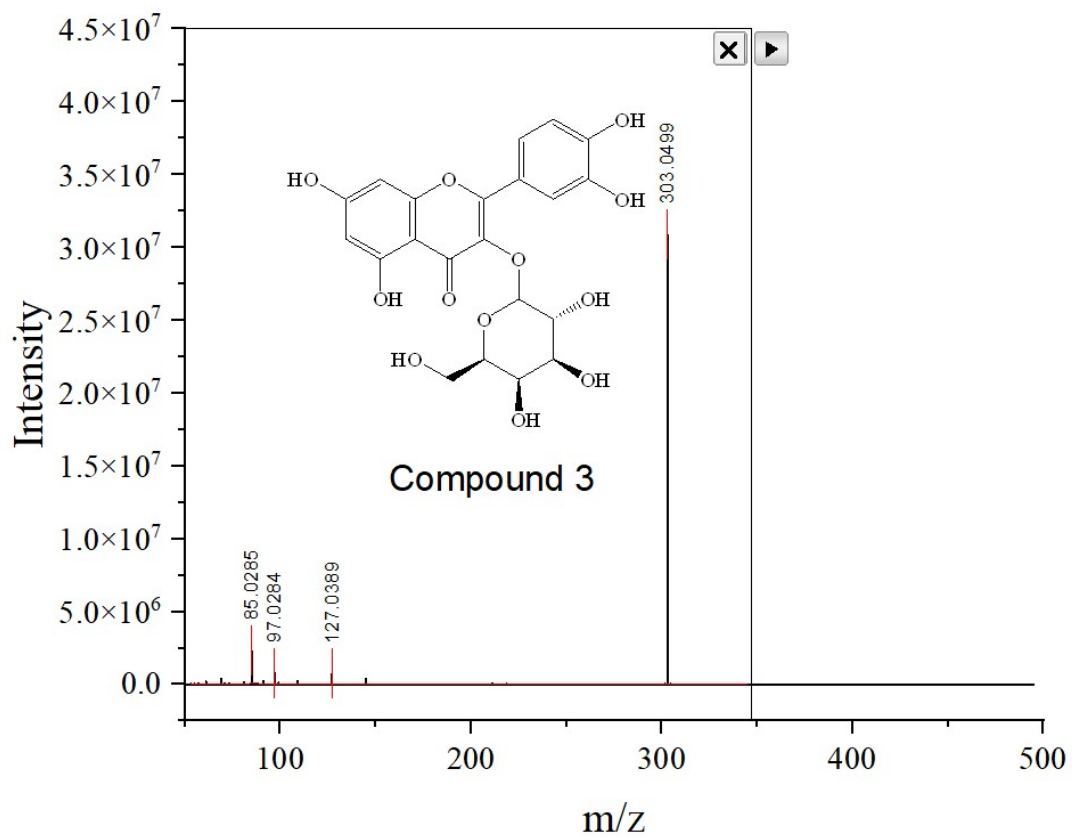

**Fig.S5** Secondary MS result for compound 3 (Quercetin 3-O-galactoside)

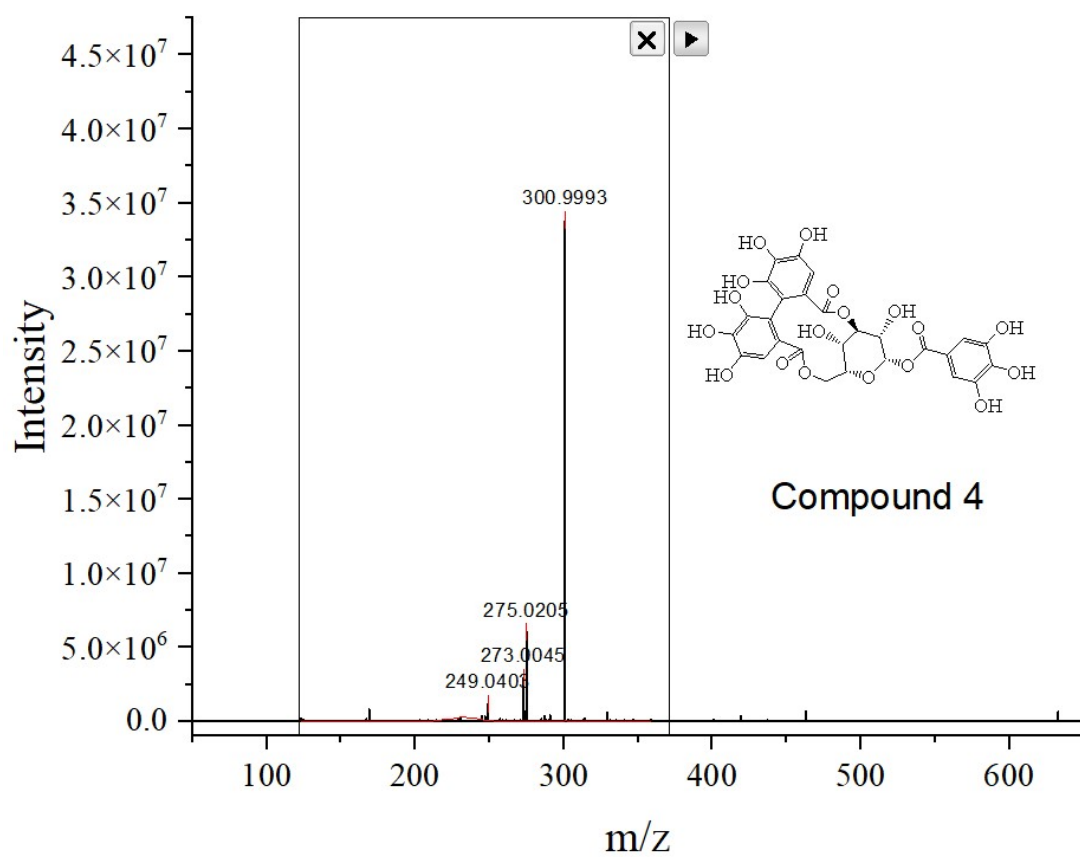

**Fig.S6** Secondary MS result for compound 4 (Corilagin)

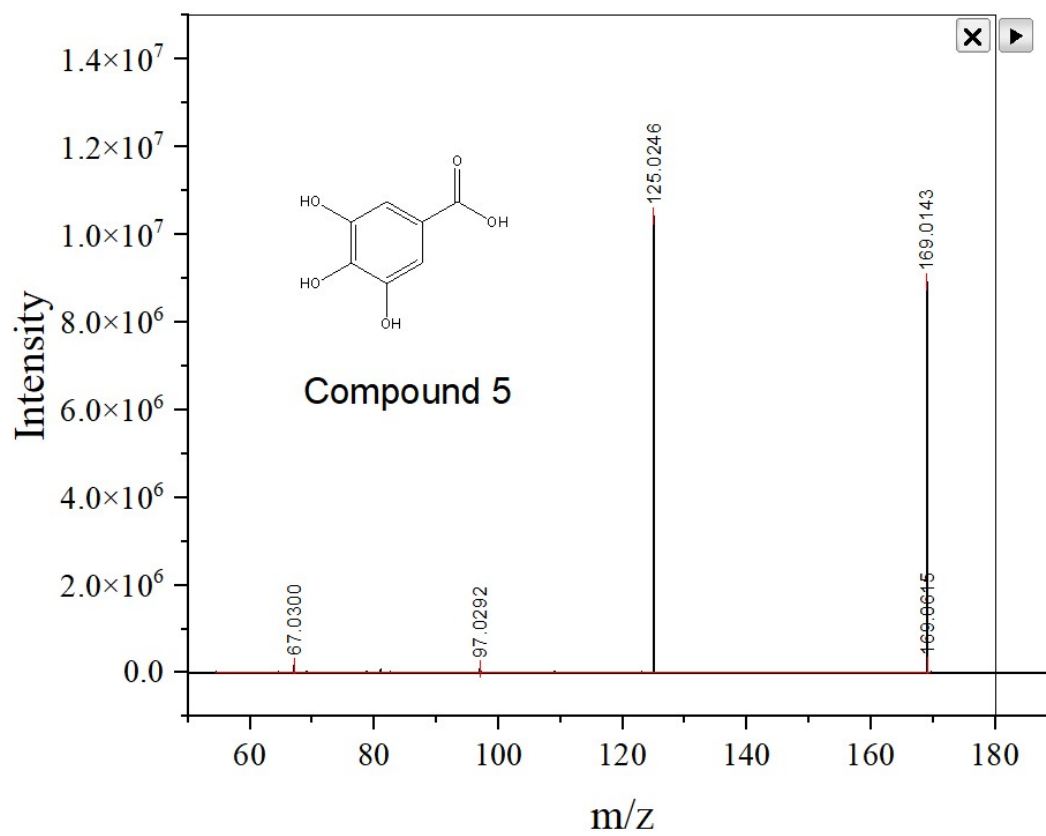

**Fig.S7** Secondary MS result for compound 5 (Gallic acid)

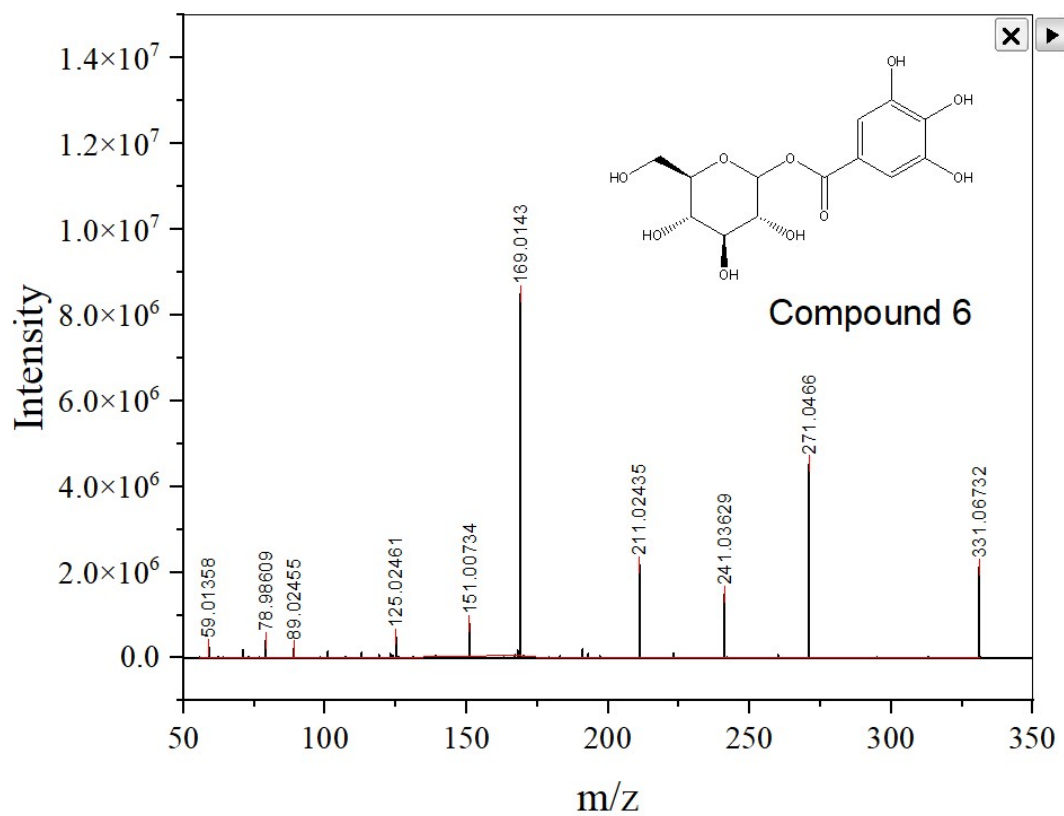

**Fig.S8** Secondary MS result for compound 6 (beta-Glucogallin)
